# Supplementary material for: Carboxypeptidase N1 is anticipated to be a synergy metrics for chemotherapy effectiveness and prognostic significance in invasive breast cancer
Source: PubMed Central journal article supplement (PMC8555242; doi:10.1186/s12935-021-02256-5), 2021-10-28
Supplement: 12935_2021_2256_MOESM2_ESM.pdf [file 12935_2021_2256_MOESM2_ESM.pdf]

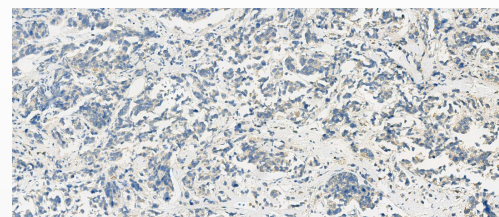

A1

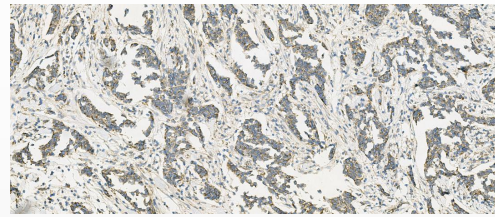

A3

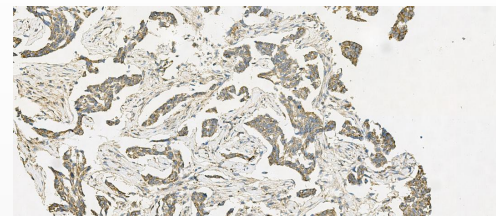

A4

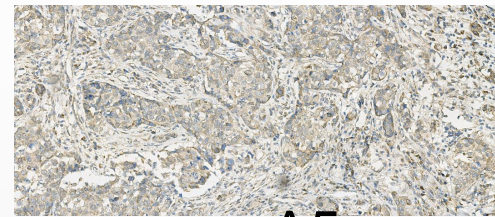

A5

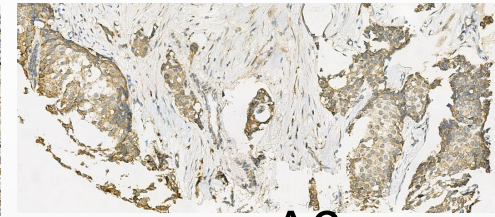

A6

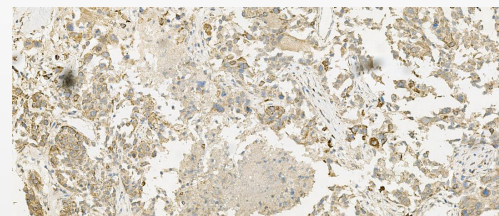

A7

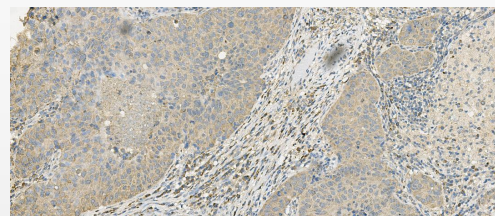

A10

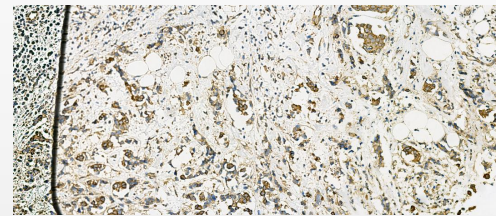

A14

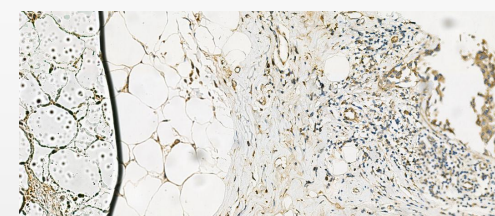

A15

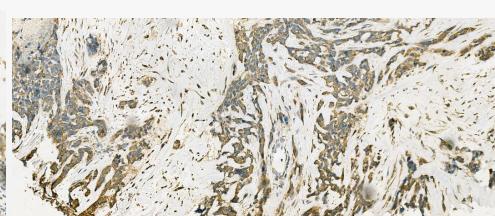

A16

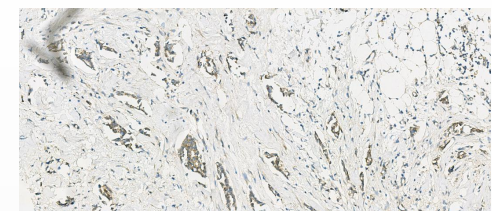

**B1**

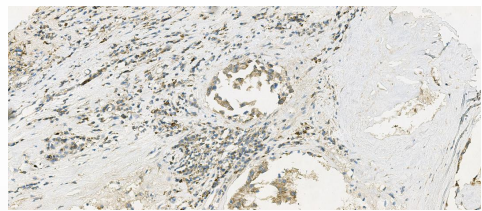

**B2**

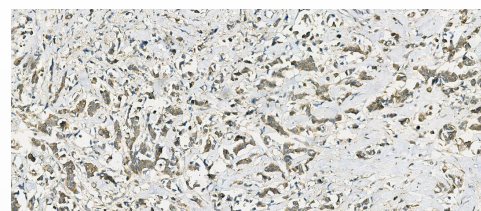

**B4**

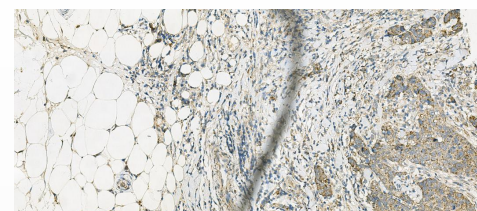

**B5**

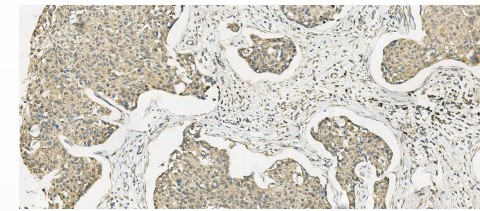

**B6**

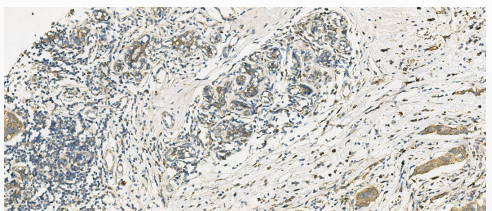

**B7**

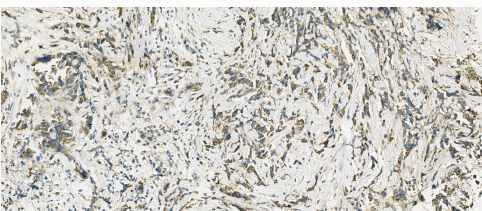

**B8**

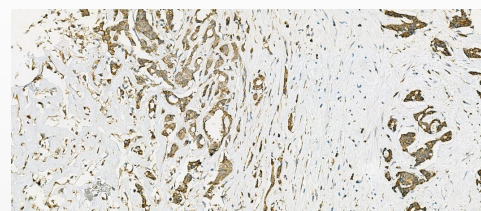

**B9**

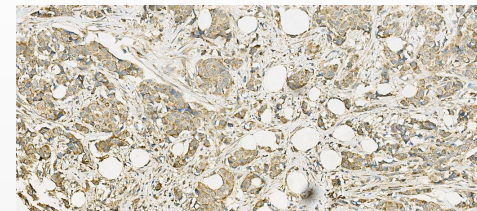

**B11**

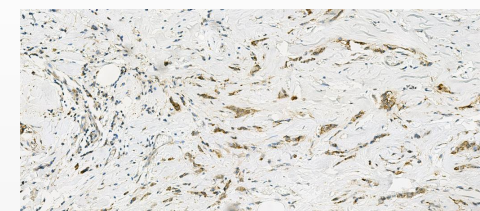

**B12**

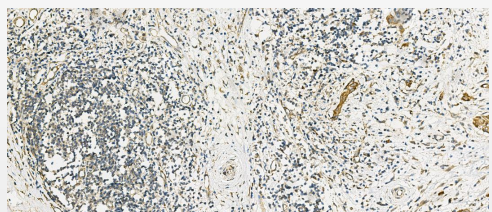

**B13**

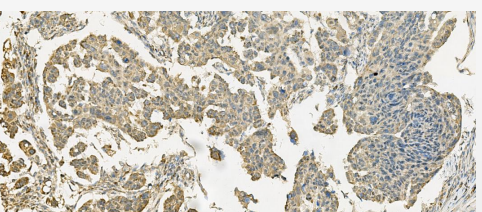

**B14**

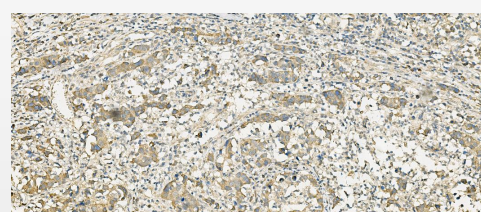

**B15**

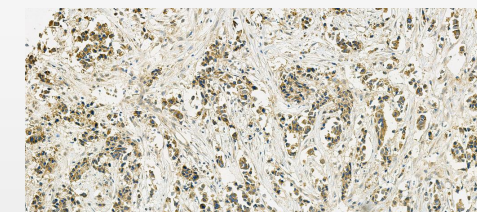

**B16**

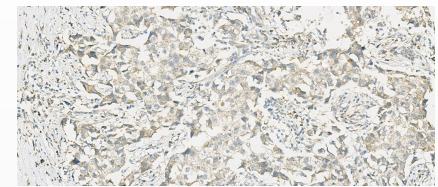

C1

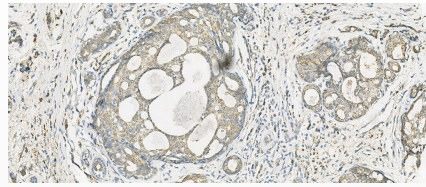

C2

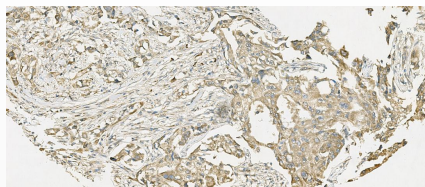

C3

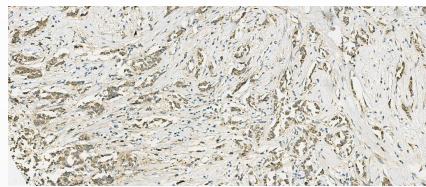

C4

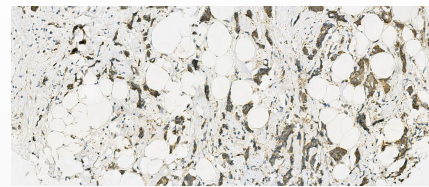

C5

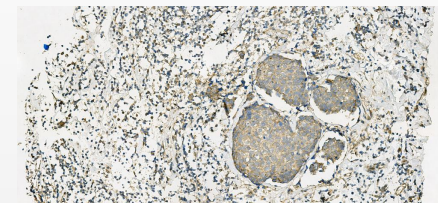

C6

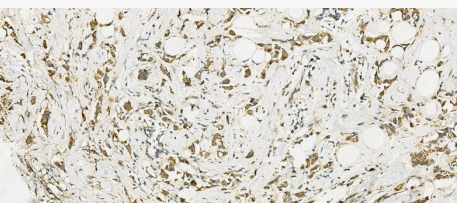

C9

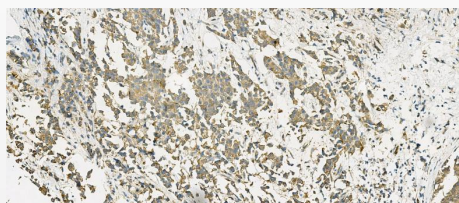

C10

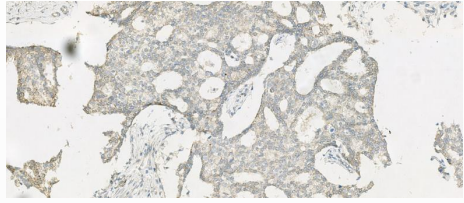

D1

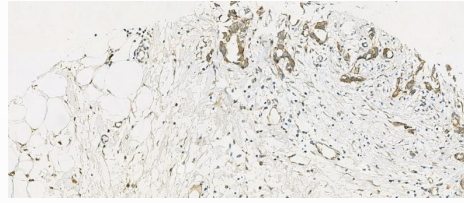

D2

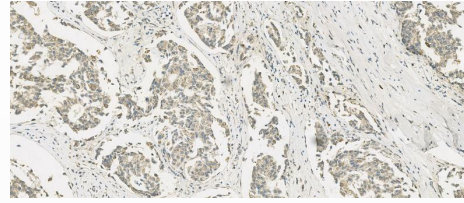

D3

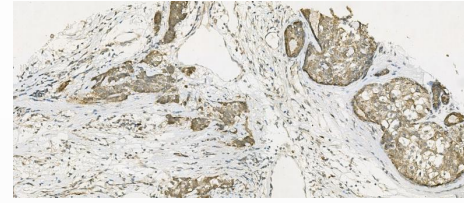

D4

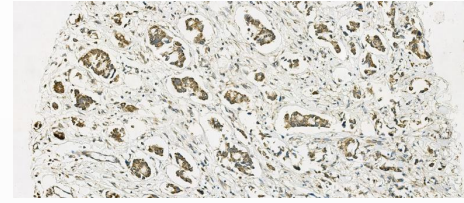

D5

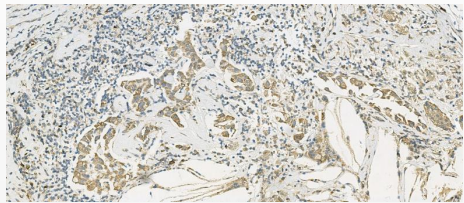

D6

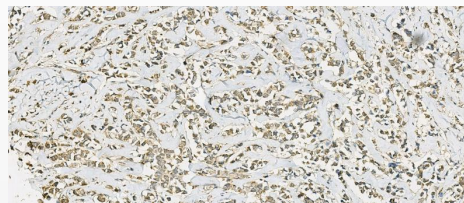

D7

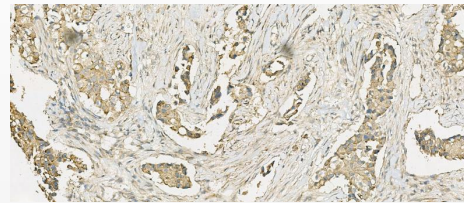

D8

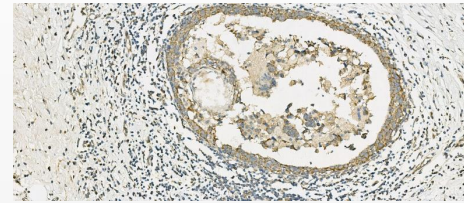

D9

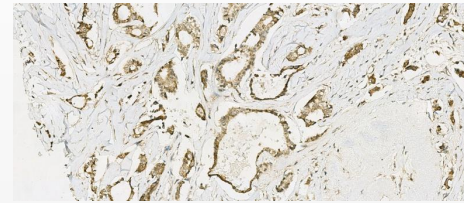

D10

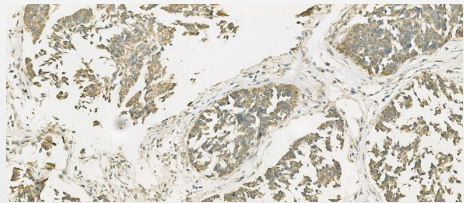

D11

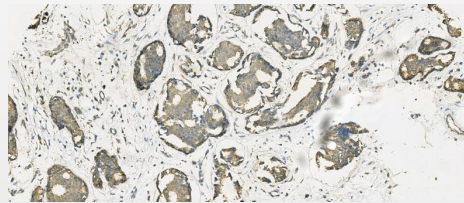

D12

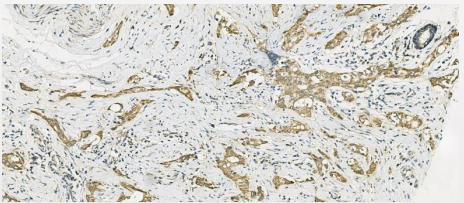

D13

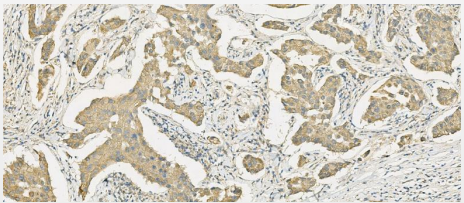

D14

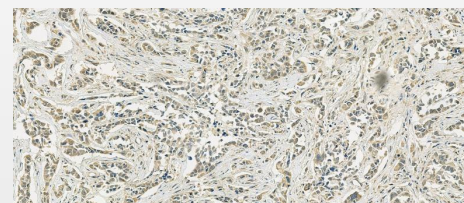

D15

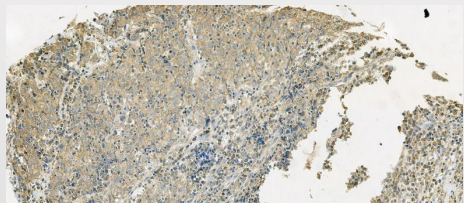

D16

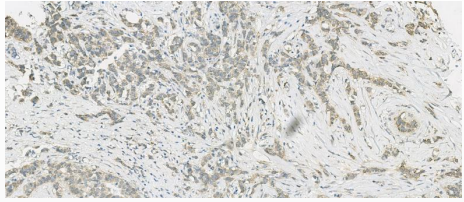

E1

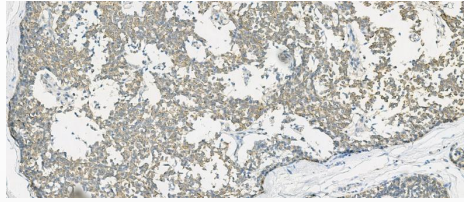

E2

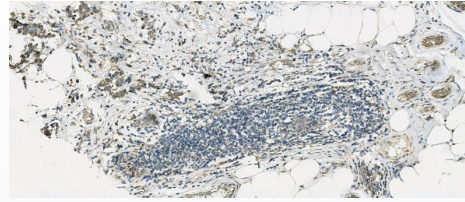

E3

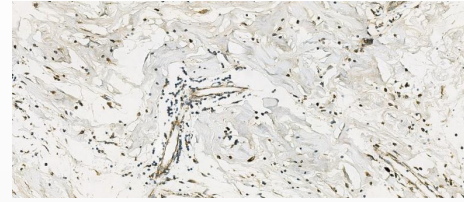

E4

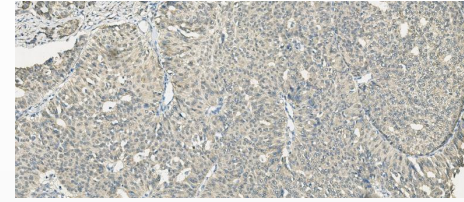

E5

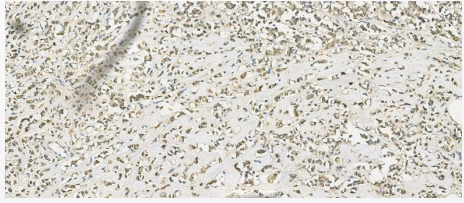

E6

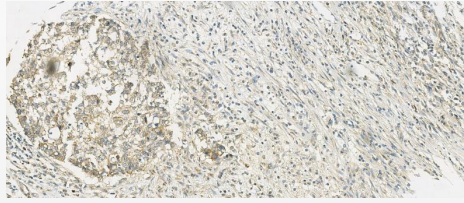

E7

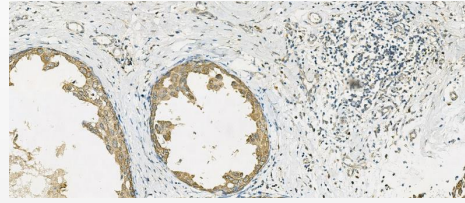

E8

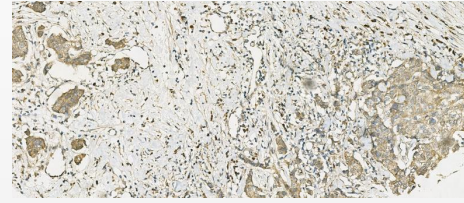

E9

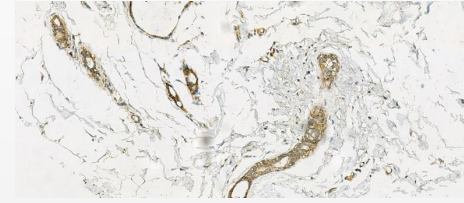

E10

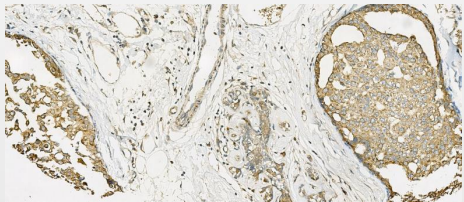

E11

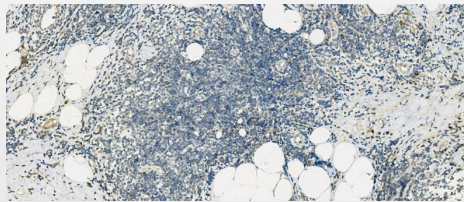

E12

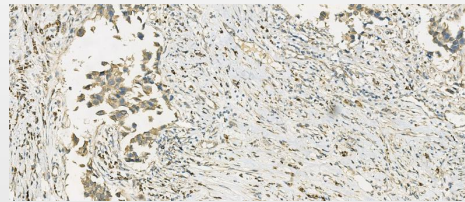

E13

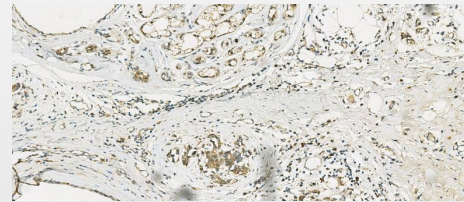

E14

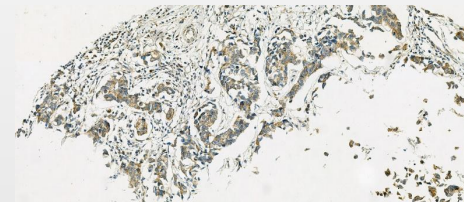

E15

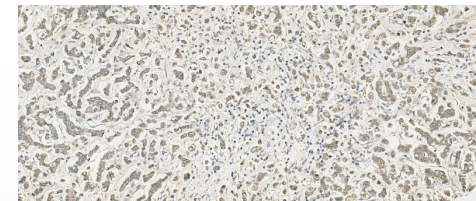

F2

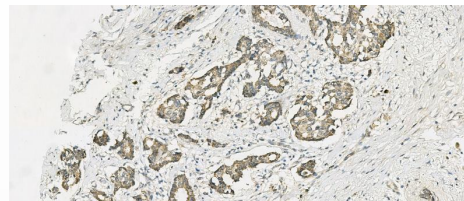

F3

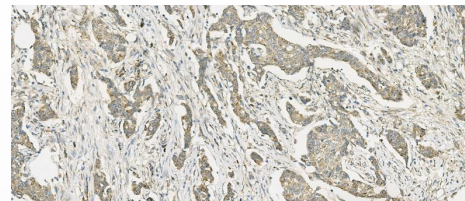

F4

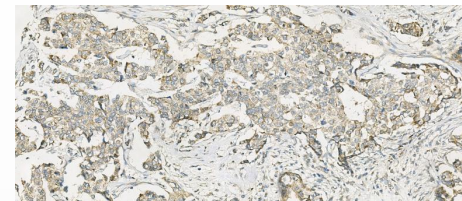

F5

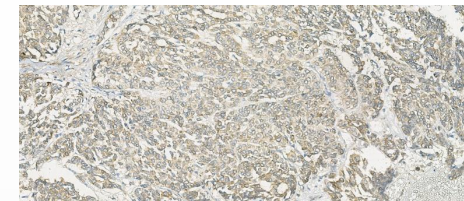

F6

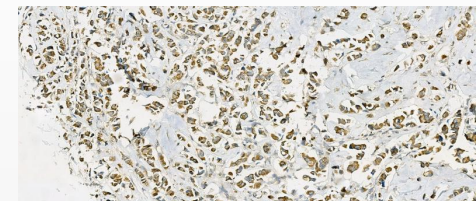

F8

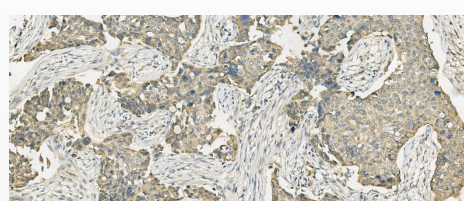

F9

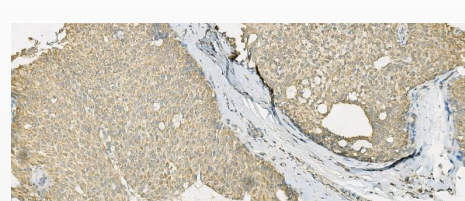

F10

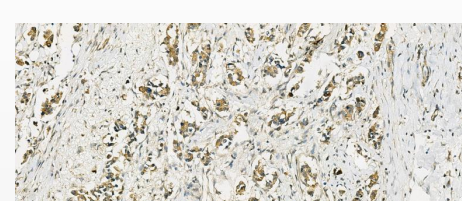

F11

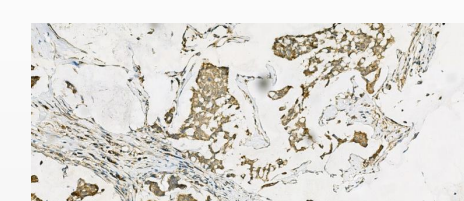

F12

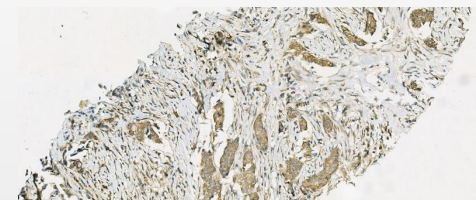

F13

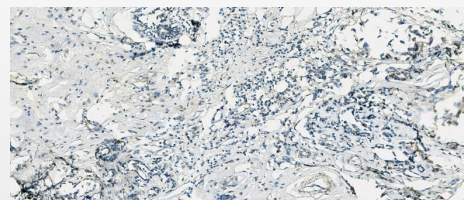

F14

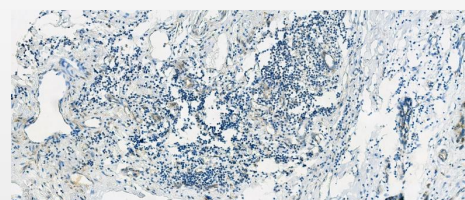

F15

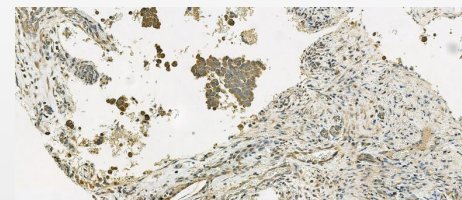

F16

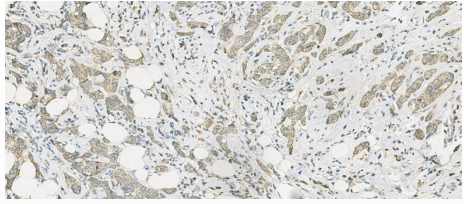

G1

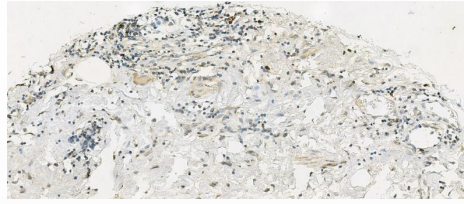

G2

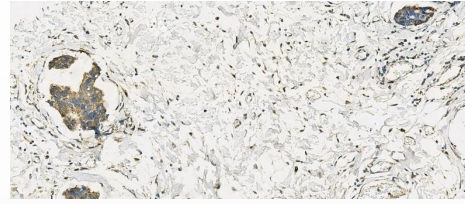

G3

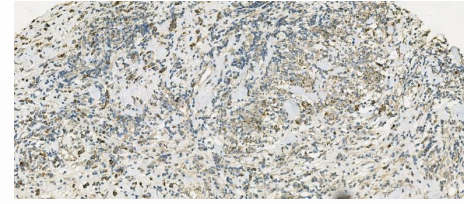

G4

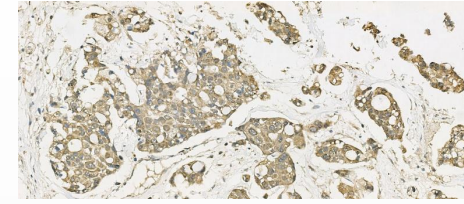

G5

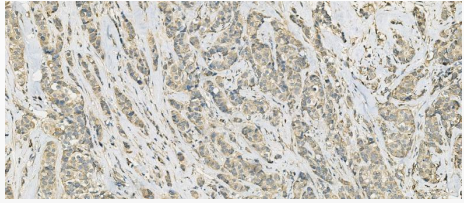

G6

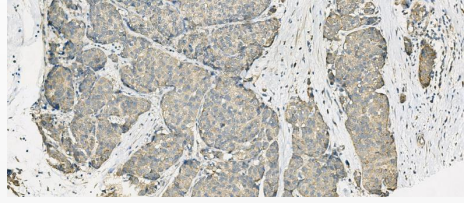

G7

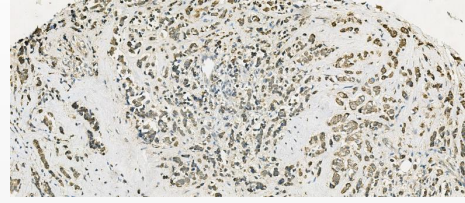

G8

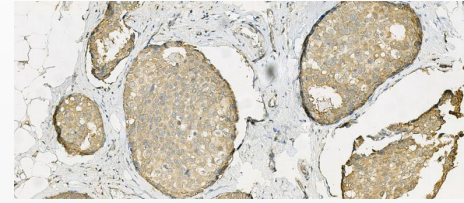

G9

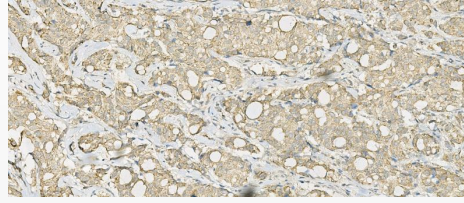

G10

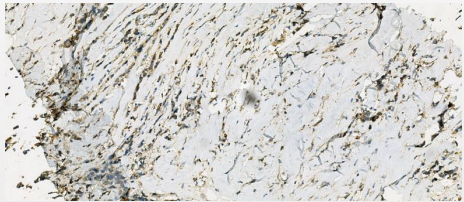

G11

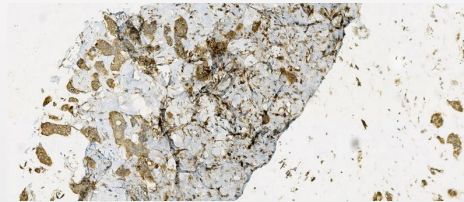

G12

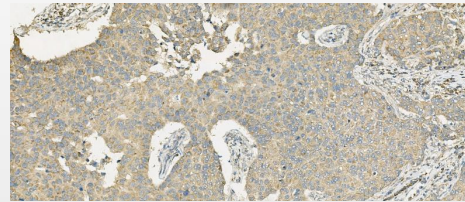

G13

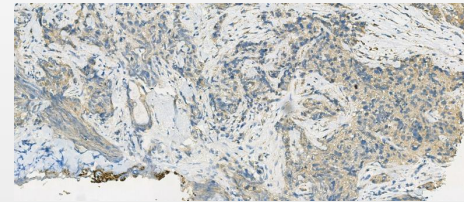

G14

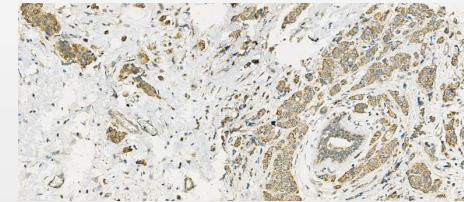

G15

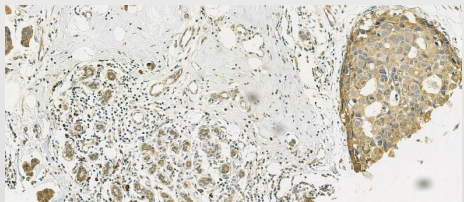

G16

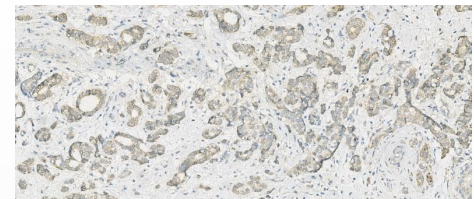

I1

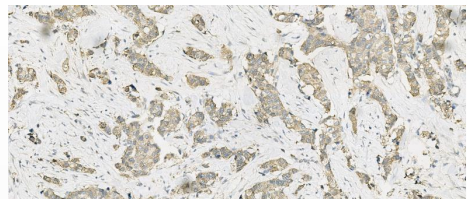

I2

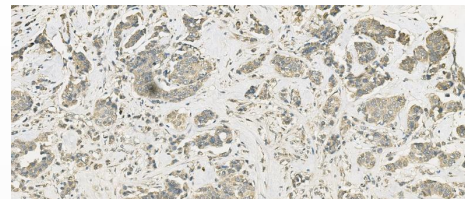

I3

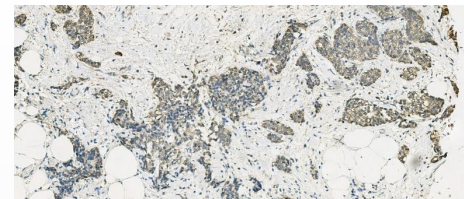

I4

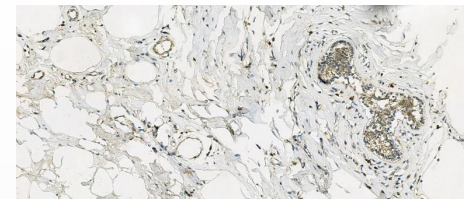

I5

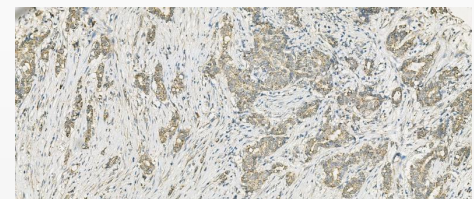

I6

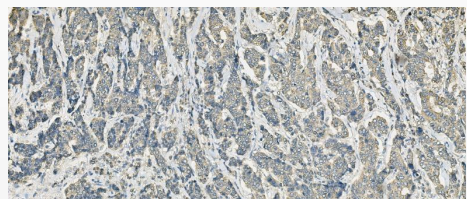

I7

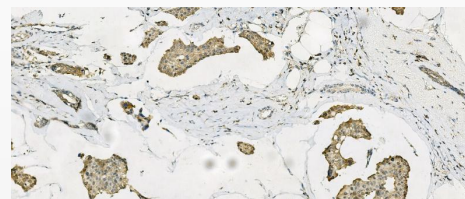

I8

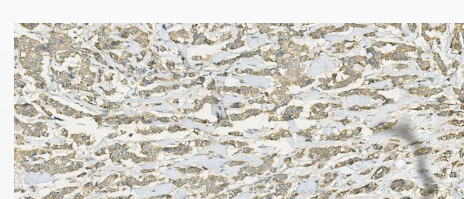

I9

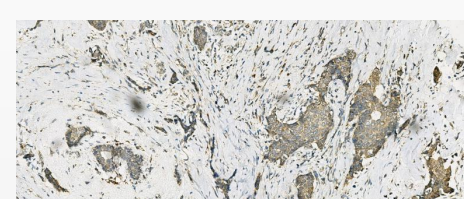

I10

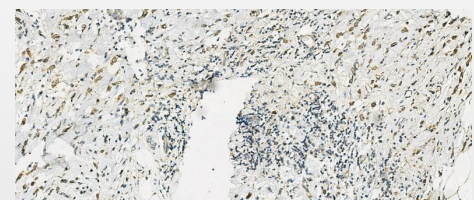

I11

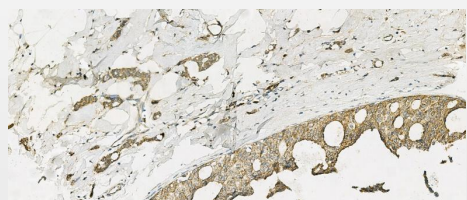

I12
